# Supplementary material for: Multi-neuron intracellular recording in vivo via interacting autopatching robots
Source: eLife. 2018 Jan 3;7:e24656. doi: 10.7554/eLife.24656 (PMC5812718; doi:10.7554/eLife.24656)
Supplement: Supplementary file 1. — The Supplementary file 1 contains the bill of materials needed to assemble the multipatcher hardware. [file elife-24656-supp1.xlsx]

## Sheet: Sheet1
DESCRIPTION	VENDOR DESCRIPTION	MFR CAT #	VENDOR CAT #	PRICE PER PKG	# UNITS PER PKG	# *UNITS* REQ PER BOX	# *PKGS* PER BOX	# PKGS PER BOX (mod 1)	NOTES
24V power supply (6.25A)		Cincon, TRG150A240-01E13-Level-V	Mouser 418-TRG150A240-01-V	102.13	1	0	0	0	for multipatcher
24V power supply (3A)		Cincon TRG70A240-12E03-Level-V	Mouser 418-TRG70A24-12-V	41.69	1	1	1	1
power cord		Phihong AC30UNA	Digikey 993-1039-ND	2.82	1	1	1	1
chassis	‪5U Black Rack Mt Chassis with Aluminum Front Panel‬	Jameco ‪ET5/35B‬	Jameco ‪132864‬	109	1	2	2	2
feet, rubber	8 Round Circle Computer Case / Laptop Rubber Feet Stand-Off with Self-Adhesive Sticker		Amazon B00A3ONV4A	4.99	8	4	0.5	1
potentiometers		Vishay 535-11103	Mouser 594-53511103	16.21	1	4	4	4
knobs for potentiometers			Mouser 5164-1450	1.1	1	4	4	4
switch, power		Cherry, SRB22A2FBBNN	Digikey CH755-ND	0.75	1	1	1	1
switch, unmarked		Cherry, SRB22A2BBBNN	Digikey CH758-ND	0.665	1	2	2	2
LED, 24V			Digikey 679-2976-ND	9.87	1	1	1	1
BNC bulkhead cnnctrs		TE Connectivity 5228226-1	Digikey A33802-ND	6.432	1	4	4	4
1/8"-1/8" bulkhead fitting	Through Wall Nylon Coupling 1/8" Tube OD		McMaster 5779K675	4.28	1	1	1	1
screws, 1/4-20 torx	18-8 SS Pan Head Torx Machine Screw 1/4"-20 Thread, 1/2" Length		McMaster 96710A733	6.8	25	10	0.4	1
nuts, 1/4-20	Plain Grade 8 Steel Hex Nut 1/4"-20 Thread Size, 7/16" Width, 7/32" Height		McMaster 90499A029	2.97	100	4	0.04	1
manometer (0-49.82 mBar)		Dwyer 475-1-FM		175	1	1	1	1
manometer (0-1379 mBar)		Dwyer 475-5-FM		135	1	1	1	1
9V battery straps	Shielded 9V Battery Straps	Keystone ‪81-8‬	Mouser 534-81-8TB	0.35	1	2	2	2
standoffs, 1/4-20 hex, 7/8"	Nylon 6/6 Female Threaded Hex Standoff 1/2" Hex, 7/8" Length, 1/4"-20 Screw Size		McMaster 92319A770	2.27	1	14	14	14	for supporting manometers
screws, 1/4-20, 5/8"	18-8 Stainless Steel Socket Head Cap Screw 1/4"-20 Thread, 5/8" Length		McMaster 92196A539	6.5	50	14	0.28	1	for manom support standoffs
barrel connector	CONN POWERJACK SOLDR W/HDWR	Switchcraft, 722A	Digikey SC1049-ND	3.52	1	1	1	1
USB cable, panel mount	StarTech 1-Feet Panel Mount USB Cable B to B - F/M (USBPNLBFBM1)		Amazon B002M8VBIS	7.89	1	1	1	1
USB extension cable (A-A)	AmazonBasics USB 2.0 A-Male to A-Female Extension Cable (9.8 Feet/3.0 Meters)		Amazon B001TH7GUU	5.99	1	1	1	1
1/4"-1/4" bulkhead fitting	Through Wall for Nylon Cplg 1/4" Tube OD		McMaster 5779K677	5.05	1	1	1	1
1/4"-1/8" adapter	Nylon Reducing Cplg for 1/4" X 1/8" Tube OD		McMaster 5779K352	4.61	1	1	1	1
panel mount gauge	Multipurpose Gauge Steel Case, 1-1/2" Dial, 1/8 NPT Panel Mount [MUST SPECIFY 0-60 PSI]		McMaster 3846K4 (SPECIFY 0-60 PSI)	14.04	1	1	1	1	MUST SPECIFY 0-60 PSI
NPTF-1/8" adapter for gauge	Nylon and Nickel-Plated Brass Tube Fitting Adapter for 1/8" Tube OD X 1/8" NPT Female Pipe		McMaster 5779K123	4.16	1	3	3	3	(inc two for Venturis)
tape, teflon					1		0	0
regulators, manual (0-5 psi)	Panel-Mount Miniature Air Regulator 1/16 Pipe Size, 2.5 Max SCFM, 0 to 5 PSI Range		McMaster 41795K31	49.74	1	1	1	1	to lo OEM
regulators, manual (0-30 psi)	Panel-Mount Miniature Air Regulator 1/16 Pipe Size, 2.5 Max SCFM, 0 to 30 PSI Range		McMaster 41795K33	49.74	1	1	1	1	to hi OEM
regulators, manual (0-60 psi)	Panel-Mount Miniature Air Regulator 1/16 Pipe Size, 2.5 Max SCFM, 0 to 60 PSI Range		McMaster 41795K34	49.74	1	2	2	2	rear panel & low venturi
adaptors for man regs	Nylon and Nickel-Plated Brass Tube Fitting Adapter for 1/8" Tube OD X 1/16" NPT Male Pipe		McMaster 5779K242	3.12	1	8	8	8
					1		0	0
acrylic sheet (clear 1/4")	Scratch-Resistant Clear Cast Acrylic Sheet 1/4" Thick, 12" X 24"		McMaster 8560K355	28.08	1	4	4	4
ORDERING - Laser cut acrylic can be ordered from Pololu Custom Laser Cutting. Send them the ".ai" files and specify that the blue lines should be etched and the black lines should be through cuts.
standoffs, 1/2" hex x 1"	Nylon 6/6 Female Threaded Hex Standoff 1/2" Hex, 1" Length, 1/4"-20 Screw Size		McMaster 92319A772	2.43	1	4	4	4	for base plate
1/4-20 screws (3/4")	18-8 Stainless Steel Socket Head Cap Screw 1/4"-20 Thread, 3/4" Length		McMaster 92196A540	6.54	50	4	0.08	1	for base plate standoffs
cable tie holders, large	UV-Resistant Cable Tie Holder Adhesive Back/Screw Mnt, 4-Way, for.35" Max Tie, Black		McMaster 7582K23	10.2	25	4	0.16	1
cable ties, large white	Standard Nylon Cable Tie 8-1/2" L, 2" Bundle Dia, 120# Tensile Strength, White		McMaster 7130K43	7.3	50	4	0.08	1
					1		0	0
Venturi device	AVR038HAVR Single Stage Vacuum Pump	Air-Vac AVR038H		34.5	1	2	2	2
adapter	Nylon and Nickel-Plated Brass Tube Fitting Adapter for 1/8" Tube OD X 1/8" NPT Male Pipe	Legris 3175 53 11	McMaster 5779K102	2.58	1	2	2	2
					1		0	0
pressure circuit board	Order from PCB Fab Express. The design files are in the "Gerber files…" directory. Can be assembled by PCA Corporation using the BOM files.			300	1	2	2	2
standoffs for boards	Nylon 6/6 Female Threaded Round Standoff 1/4" OD, 5/8" Length, 4-40 Screw Size		McMaster 96110A011	1.01	1	12	12	12
screws thru boards (4-40 x 5/16)	18-8 SS Pan Head Slotted Machine Screw 4-40 Thread, 5/16" Length		McMaster 91792A107	4.64	100	8	0.08	1
screws for OEMs (4-40 x 7/16)	18-8 SS Pan Head Slotted Machine Screw 4-40 Thread, 3/8" Length		McMaster 91792A108	4.84	100	8	0.08	1	use THESE for OEMs instead of 7/16"; form factor changed slightly (3/6/2013)
screws thru acrylic (4-40 x 7/16)	18-8 SS Pan Head Slotted Machine Screw 4-40 Thread, 7/16" Length		McMaster 91792A109	5.18	100	12	0.12	1
standoffs, 3"			McMaster 92319A783	5.56	1	4	4	4
screws for above (10-32 x 5/8")	18-8 SS Pan Head Slotted Machine Screw 10-32 Thread, 5/8" Length		McMaster 91792A830	10.31	100	9	0.09	1	inc one for fastening USB-6211
cable ties, 8" black	Standard Nylon Cable Tie 8" L, 2-3/8" Bundle Dia, 40#Tensile Strength, UV Black		McMaster 7130K54	6.11	100	13	0.13	1
pressure controller, high		Parker Hannifin, 990-005101-015		440	1	1	2	2
pressure controller, low		Parker Hannifin, 990-005101-002		440	1	1	1	1
vacuum controller, high		Parker Hannifin, 990-005203-005		490	1	1	1	1
vacuum controller, low		Parker Hannifin, 990-005201-002		490	1	1	1	1
1/8" adapters for controllers	Nylon and Nickel-Plated Brass Tube Fitting Adapter for 1/8" Tube OD X 10-32 UNF Male Thread		McMaster 5779K241	2.33	1	8	8	8
screws for OEMs (4/40 x 7/16")					1	0	0	0	(inc'd above: "screws thru acrylic")
screws for VSOs (8-32 x 7/16")	18-8 SS Pan Head Slotted Machine Screw 8-32 Thread, 7/16" Length		McMaster 91792A193	6.06	100	4	0.04	1
valves	High Density Interface (HDI) 3-way Solenoid Valve	Lee Company, LHDA0533115H		72.61	1	6	6	6
valve circuit boards	Order from PCB Fab Express. The design files are in the "Gerber files…" directory. Can be assembled by PCA Corporation using the BOM files.			300	1	8	8	8
standoffs, vlv spprt (1/4" hx x 1.5")			McMaster 92319A776	3.58	1	2	2	2
BNC relay	Tohtsu CX-230 BNC relay switch	Tohtsu CX-230	RF Parts CX-230	79	1	6	6	6
cable tie, white small					1	1	1	1
BNC(F)-binding post adapter	BNC Adapter BNC Female to Stackable Double Binding Post		McMaster 6704K13	12.3	1	8	8	8
BNC(M)-binding post adapter	BNC Adapter BNC Male to Stackable Double Binding Post		McMaster 6704K14	14.43	1	8	8	8
NI Compact DAQ 9185 with 16 bit, 16 channel AI, 16 bit, 8 channel AnO, and 16 bit 16 ch Digital IO				3860	1	1	1	1
BNC cable, 1'			Mouser 523-115101-19-12.00	7.07	1	12	12	12
BNC cable, 2'			Mouser 523-115101-19-24.00	8.09	1	12	12	12
BNC T adapter			Mouser 523-31-208-RFX	5.51	1	6	6	6
BNC elbow adapter					1			0	ADD INFO FOR THIS
								0
plumbing:								0
1/4"-1/8" elbow adaptor	90 Deg Reducing Elbow for 1/4" X 1/8" Tube OD		McMaster 5779K661	4.1	1	12	12	12
1/8" T adapters	Nylon Tee for 1/8" Tube OD		McMaster 5779K31	5.26	1	16	16	16
tubing, blue	Choose-A-Color Polyurethane Tubing Opaque Blue, .066" ID, 1/8" OD, .030" Wall Thk		McMaster 5648K224	0.19	1	30	30	30	ft
					1		0	0
wire, 18 ga (red)			Digikey C2103R-100-ND	28.69	100	3	0.03	1	ft
wire, 18 ga (black)			Digikey C2103B-100-ND	28.69	100	2	0.02	1	ft
wire, 24 ga (red)			Digikey A3050B-100-ND	15.75	100	20	0.2	1	ft (length required estimated)
wire, 24 ga (black)			Digikey A3050R-100-ND	15.75	100	20	0.2	1	ft (length required estimated)
wire, 24 ga (orange)			Digikey A3050A-100-ND	15.75	100	20	0.2	1	ft (length required estimated)
wire, 24 ga (yellow)			Digikey A3050Y-100-ND	15.75	100	20	0.2	1	ft (length required estimated)
heat shrink, 1/16"	Flexible Polyolefin Heat-Shrink Tubing 1/16" ID Before, 1/32" ID After, 12" L, Black		McMaster 7496K411		1	0	0	0	in
cable ties, small	Standard Nylon Cable Tie 4" L, 7/8" Bundle Dia, 18# Tensile Strg, UV Black		McMaster 7130K52	2.43	100	5	0.05	1
cable tie holders, small	UV-Resistant Cable Tie Holder Adhesive Back/Screw Mnt, 4-Way, for.18" Max Tie, Black		McMaster 7582K22	9.16	50	6	0.12	1	plus below if acrylic for back panel
IF USING ACRYLIC FOR FRONT/BACK PANELS:
acrylic sheet (black 1/8")	Optically Colored Cast Acrylic Sheet 1/8" Thick, 24" X 24" [MUST SPECIFY BLACK]		McMaster 8505K14 (SPECIFY BLACK)	26.39	1	1	1	1	[MUST SPECIFY BLACK]
(front corner screws, torx)	18-8 SS Pan Head Torx Machine Screw 10-32 Thread, 1/2" Length		McMaster 96710A578	7.41	25	4	0.16	1	for front panel corners
(front corner nuts)	Znc-Pltd STL Machine Screw Nut W/Tooth Washer 10-32 Thread Sz, 3/8" Nut Width, 1/8" Nut Height		McMaster 90675A195	3.27	100	5	0.05	1	inc one for fastening USB-6211
(back corner/bottom screws)	18-8 SS Pan Head Slotted Machine Screw 4-40 Thread, 1/2" Length		McMaster 91792A110	5.56	100	8	0.08	1
(back corner/bottom standoffs)	Nylon 6/6 Female Threaded Round Standoff 1/4" OD, 3/4" Length, 4-40 Screw Size		McMaster 96110A012	1.01	1	8	8	8
cable ties, small	Standard Nylon Cable Tie 4" L, 7/8" Bundle Dia, 18# Tensile Strg, UV Black		McMaster 7130K52	2.39	100	4	0.04	1
cable tie holders, small	UV-Resistant Cable Tie Holder Adhesive Back/Screw Mnt, 4-Way, for.18" Max Tie, Black		McMaster 7582K22	9.16	50	8	0.16	1
ORDERING - Laser cut acrylic can be ordered from Pololu Custom Laser Cutting. Send them the ".ai" files and specify that the blue lines should be etched and the black lines should be through cuts.
							11953.9	12164.3
EXTERNAL HARDWARE:
computer
tubing from wall air and vacuum	Choose-A-Color Polyurethane Tubing Opaque Black, .160" ID, 1/4" OD, .045" Wall Thk		McMaster 5648K251	0.44	1	12			ft (length required estimated)
shutoff valve for pressurized air input	Miniature Chrome-Plated Brass Ball Valve Lever Handle, 1/4" NPT Female Connections		McMaster 4912K17	6.88	1	1	1		shutoff valve for input to box
fittings for shutoff valve	Black UV-Resistant Polyproplene Tube Fitting Adapter for 1/4" Tube OD X 1/4" NPTF Male Pipe		McMaster 5562K121	1.8	1	3	3		2 for shutoff valve, 1 to adapt to wall spigot
tubing for output to pipette	Choose-A-Color Polyurethane Tubing Opaque Black, .066" ID, 1/8" OD, .030" Wall Thk		McMaster 5648K221	0.19	1	10
tubing for pipette holder	Miniature Clear EVA Tubing .04" ID, .07" OD, .015" Wall Thickness		McMaster 1883T3	1.38	1	2			ft (length required estimated)
barbed fitting for connecting above	FDA White Nylon Single-Barbed Tube Fitting Coupling for 1/16" Tube ID		McMaster 5116K16	2.7	10	1
filter for air inlet	Bacterial Air Vents, Pall® Life Sciences	Pall 4308	VWR 28144-160	118.34	10	1
tubing, 1/4" i.d.	Masterkleer PVC Tubing 1/4" ID, 1/2" OD, 1/8" Wall Thickness		McMaster 5233K58	0.56	1	0.5			ft
hose clamps	Worm-Drive Hose Clamp W/Zinc Pltd Steel Screw 7/32" to 5/8" Clamp Dia Range, 5/16" Band Width		McMaster 5388K14	5.87	10	2
